# Supplementary material for: Epigenetic clocks suggest accelerated aging in patients with isolated REM Sleep Behavior Disorder
Source: Springer Nature journal article supplement (doi:10.1038/s41531-023-00492-2), 2023-03-30
Supplement: MOESM1 [file 41531_2023_492_MOESM1_ESM.pdf]

## SUPPLEMENTARY MATERIAL

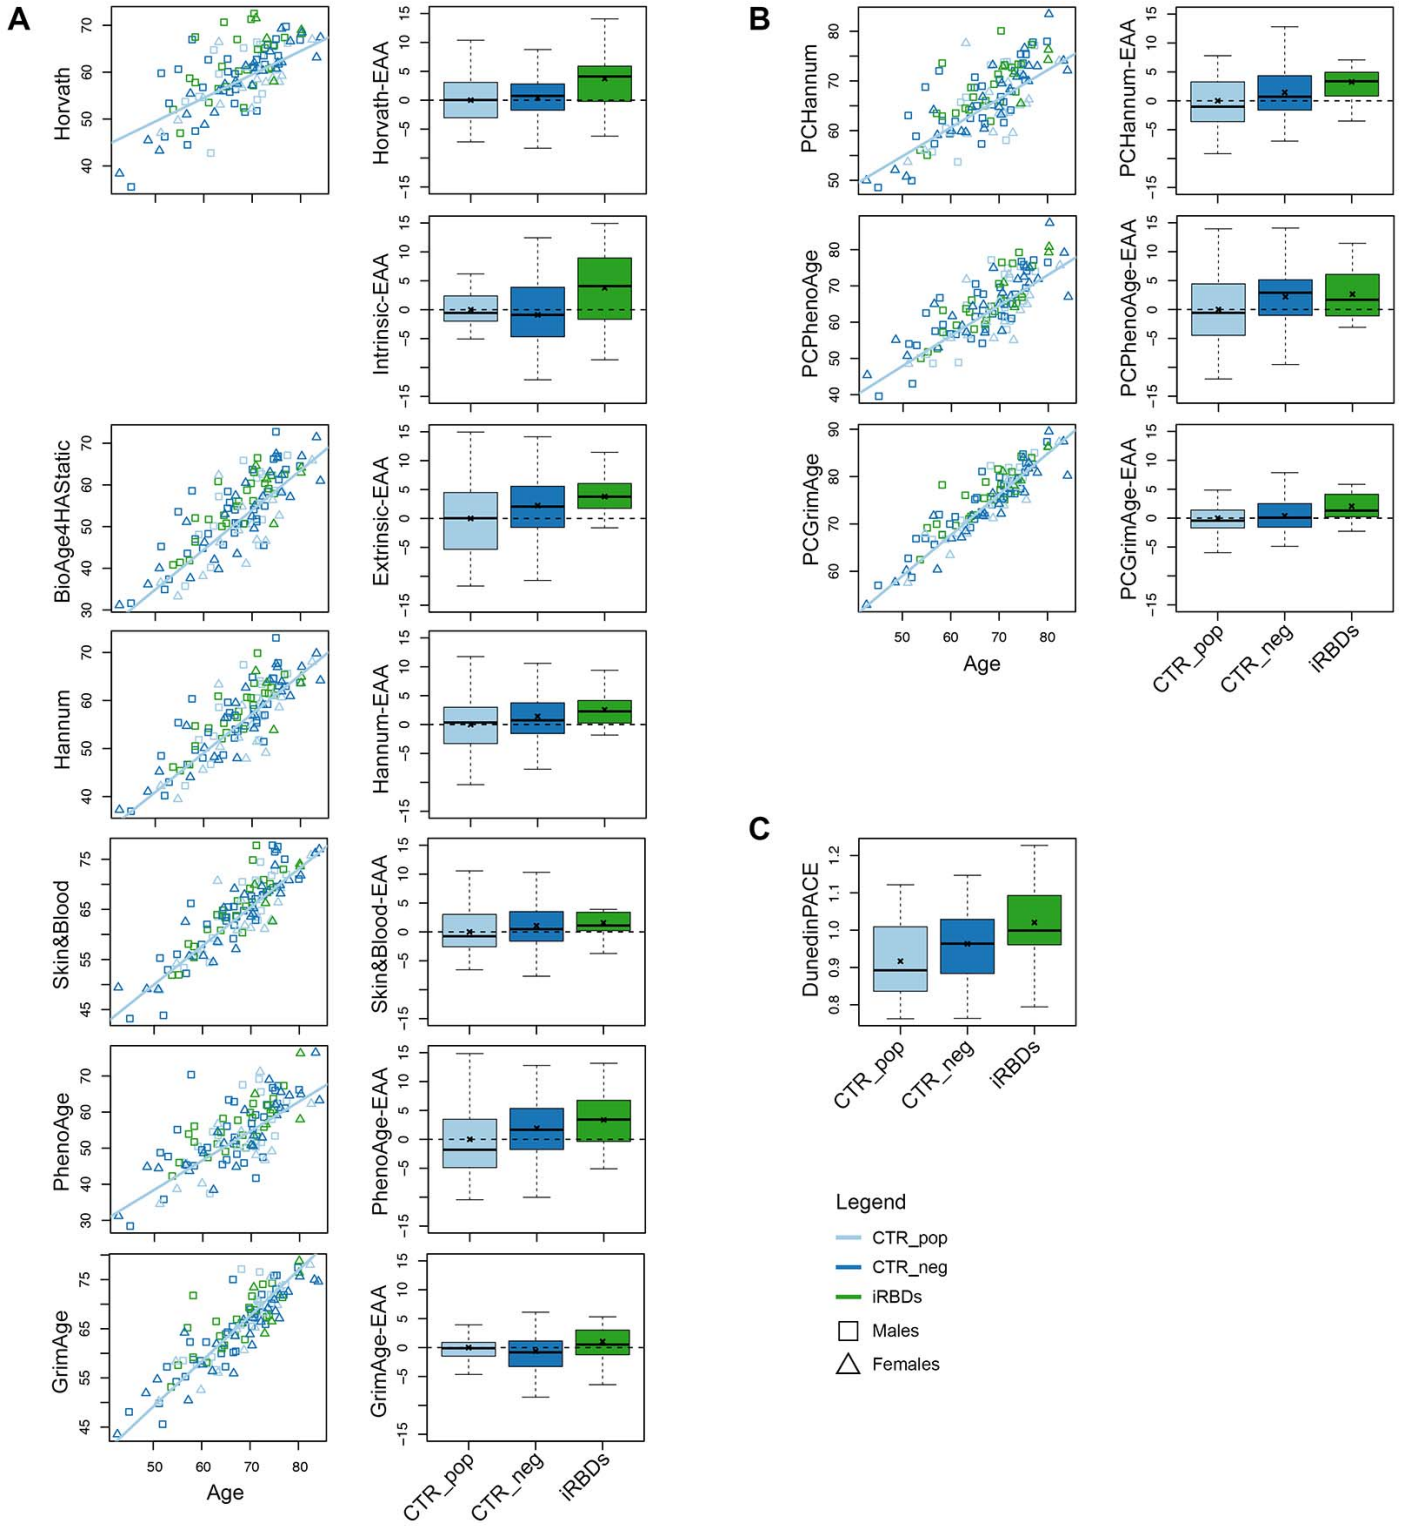

**Supplementary Figure 1.** Epigenetic age acceleration in iRBD patients. (A) Results from the Horvath's DNA Methylation Age Calculator. Left panels: scatter plot of epigenetic age vs chronological age for the different clocks. Right panels: for each clock, the boxplots of EAA values for the 3 groups under investigation are reported. Note that for Intrinsic-EAA the scatterplot is not reported, as these EAA values were calculated from the Horvath's clock correcting for estimated blood cell counts. B) Results from the Higgins-Chen calculator. Left panels: scatter plot of epigenetic age vs chronological age for the different clocks. Right panels: for each clock, the boxplots of EAA values for the 3 groups under investigation are reported. Note that for PCHorvath and PCSkin&Blood results are reported in Figure 1. C) Results from the DunedinPACE clock. The boxplots report the values of pace of biological aging for the 3 groups under investigation.

*Legend.* x: mean; central line: median; bounds of the box: 25<sup>th</sup> (lower bound) and 75<sup>th</sup> (upper bound) percentile; whiskers: minimum (lower whisker) and maximum (upper whisker).

**Supplementary table 1.** Epigenetic Age Acceleration (EAA) measures in converted (or dead) and non-converted iRBD patients.

|                         | Parameter        | CTR_neg<br>(mean ± sd) | iRBDs_conv<br>(mean ± sd) | iRBDs_n_conv<br>(mean ± sd) | CTR_neg vs<br>iRBDs_n_conv<br>p-value | CTR_neg vs<br>iRBDs_conv<br>p-value | iRBDs_n_conv<br>vs iRBDs_conv<br>p-value |
|-------------------------|------------------|------------------------|---------------------------|-----------------------------|---------------------------------------|-------------------------------------|------------------------------------------|
| Horvath calculator      | Horvath-EAA      | 0.42 ± 4.78            | 1.55 ± 5.73               | 4.62 ± 5.40                 | <b>0.022</b>                          | 0.677                               | 0.375                                    |
|                         | intrinsic-EAA    | -0.90 ± 5.92           | -0.60 ± 6.13              | 5.54 ± 6.32                 | <b>0.012</b>                          | 0.945                               | 0.093                                    |
|                         | extrinsic-EAA    | 2.23 ± 5.62            | 1.39 ± 4.68               | 4.73 ± 3.92                 | 0.088                                 | 0.555                               | 0.098                                    |
|                         | Hannum-EAA       | 1.41 ± 4.34            | 0.48 ± 3.77               | 3.39 ± 3.47                 | 0.064                                 | 0.479                               | 0.080                                    |
|                         | Skin&Blood-EAA   | 1.07 ± 3.66            | 0.41 ± 3.62               | 2.05 ± 3.34                 | 0.103                                 | 0.553                               | 0.129                                    |
|                         | PhenoAge-EAA     | 1.92 ± 6.60            | 1.55 ± 3.90               | 4.09 ± 4.78                 | 0.235                                 | 0.781                               | 0.184                                    |
|                         | GrimAge-EAA      | -0.63 ± 3.79           | -0.87 ± 2.94              | 1.80 ± 4.73                 | 0.056                                 | 0.649                               | 0.18                                     |
| Higgins-Chen calculator | PCHorvath-EAA    | 1.71 ± 4.55            | 4.03 ± 5.81               | 4.99 ± 3.97                 | <b>0.029</b>                          | 0.243                               | 0.961                                    |
|                         | PCHannum-EAA     | 1.45 ± 4.40            | 1.71 ± 3.96               | 3.87 ± 4.13                 | <b>0.039</b>                          | 0.971                               | 0.231                                    |
|                         | PCSkin&Blood-EAA | 2.09 ± 4.73            | 4.70 ± 7.36               | 7.63 ± 5.44                 | <b>0.003</b>                          | 0.198                               | 0.667                                    |
|                         | PCPhenoAge-EAA   | 2.20 ± 5.32            | 3.33 ± 3.98               | 2.37 ± 4.67                 | 0.480                                 | 0.522                               | 0.779                                    |
|                         | PCGrimAge-EAA    | 0.39 ± 3.01            | 1.30 ± 2.31               | 2.37 ± 3.25                 | 0.088                                 | 0.611                               | 0.579                                    |
|                         | DunedinPACE      | 0.96 ± 0.10            | 0.99 ± 0.10               | 1.03 ± 0.11                 | 0.115                                 | 0.501                               | 0.952                                    |

*Legend.* iRBD\_conv: isolated REM sleep behaviour disorder patients converted into an overt neurodegenerative disease, or who died, at the end of follow-up; iRBD\_n\_conv: isolated REM sleep behaviour disorder patients still without any manifest neurodegenerative disease at the end of follow-up. Statistically significant results are in **bold**.

**Supplementary table 2.** Regression models between Epigenetic Age Acceleration (EAA) measures and iRBD duration.

|                         | <b>Parameter</b> | <b>iRBD duration<br/>beta coefficient</b> | <b>iRBD duration<br/>p-value</b> |
|-------------------------|------------------|-------------------------------------------|----------------------------------|
| Horvath calculator      | Horvath-EAA      | 0.010                                     | 0.488                            |
|                         | intrinsic-EAA    | 0.009                                     | 0.594                            |
|                         | extrinsic-EAA    | 0.003                                     | 0.782                            |
|                         | Hannum-EAA       | 0.005                                     | 0.611                            |
|                         | Skin&Blood-EAA   | 0.006                                     | 0.519                            |
|                         | PhenoAge-EAA     | 0.004                                     | 0.729                            |
|                         | GrimAge-EAA      | 0.012                                     | 0.324                            |
| Higgins-Chen calculator | PCHorvath-EAA    | 0.016                                     | 0.174                            |
|                         | PCHannum-EAA     | 0.014                                     | 0.227                            |
|                         | PCSkin&Blood-EAA | 0.023                                     | 0.107                            |
|                         | PCPhenoAge-EAA   | 0.008                                     | 0.489                            |
|                         | PCGrimAge-EAA    | 0.006                                     | 0.480                            |
|                         | DunedinPACE      | 0.000                                     | 0.969                            |

*Legend.* iRBD: isolated REM sleep behaviour disorder.

**Supplementary table 3.** Estimated blood cell types in iRBDs vs CTR\_neg patients.

| <b>Parameter</b> | <b>CTR_neg<br/>(mean ± sd)</b> | <b>iRBDs<br/>(mean ± sd)</b> | <b>CTR_neg vs iRBDs<br/>p-value</b> |
|------------------|--------------------------------|------------------------------|-------------------------------------|
| CD8              | 0.03 ± 0.03                    | 0.04 ± 0.04                  | 0.199                               |
| CD4              | 0.15 ± 0.07                    | 0.12 ± 0.05                  | 0.108                               |
| NK               | 0.06 ± 0.04                    | 0.08 ± 0.04                  | 0.064                               |
| B cell           | 0.04 ± 0.02                    | 0.03 ± 0.02                  | 0.242                               |
| Monocytes        | 0.07 ± 0.02                    | 0.07 ± 0.02                  | 0.270                               |
| Granulocytes     | 0.63 ± 0.09                    | 0.64 ± 0.08                  | 0.695                               |
| Plasmablasts     | 1.76 ± 0.20                    | 1.85 ± 0.21                  | 0.730                               |
| CD8pCD28nCD45RAn | 9.19 ± 3.19                    | 8.79 ± 3.30                  | 0.448                               |
| CD8 naive        | 218.42 ± 44.87                 | 200.16 ± 35.43               | 0.215                               |
| CD4 naive        | 617.33 ± 97.64                 | 601.93 ± 122.30              | 0.184                               |

*Legend.* iRBDs: isolated RBD patients; CTR\_neg: controls negative for REM Sleep Behaviour Disorder (RBD) at videopolysomnography; sd: standard deviation.
